# Supplementary material for: Sulfur resistance mechanism of PdSx catalysts in catalytic oxidation of toluene
Source: Royal Society of Chemistry journal article supplement (doi:10.1039/d4cy00349g), 2024-01-01
Supplement: d4cy00349g1.pdf [file d4cy00349g1.pdf]

Supplementary Information for  
Sulfur Resistance Mechanism of PdS<sub>x</sub> Catalyst in Catalytic  
Oxidation of Toluene

Huadong Liu, Jiawei Bian, Zhaofei Sun, Hao Ling, Feng Ju\*

*School of Chemical Engineering, East China University of Science and Technology,*

*Shanghai 200237, China;*

*E-mail addresses: jufeng@ecust.edu.cn(Feng Ju).*

**Supporting information:**

**Contents:**

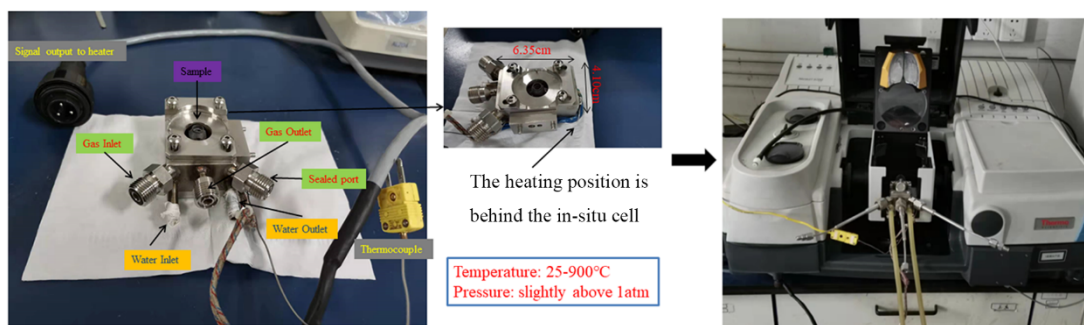

XPS spectra of fresh catalysts S species, before catalytic activity test (a), after catalytic activity test (b)

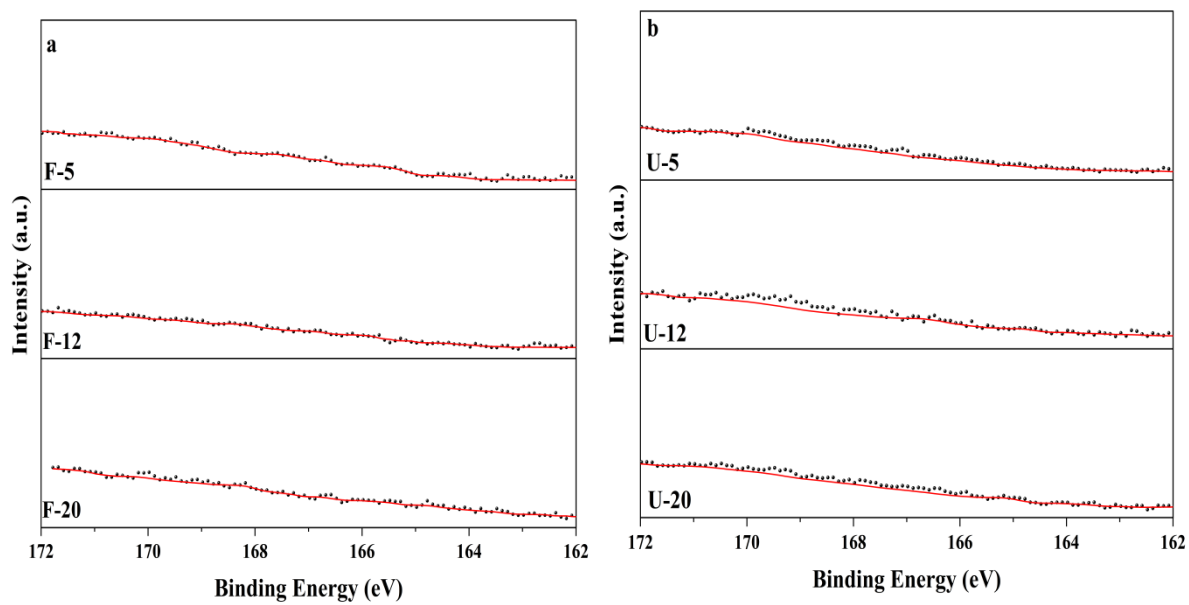

**Figure. S2** XPS spectra of fresh catalysts S species, before catalytic activity test (a), after catalytic activity test (b)
